# Supplementary material for: Political environment and mortality rates in the United States, 2001-19: population based cross sectional analysis
Source: PubMed Central journal article supplement — BMJ. 2022 Jun 7;377:e069308. doi: 10.1136/bmj-2021-069308 (PMC9171631; doi:10.1136/bmj-2021-069308), 2022-06-07

| <b>Online Table 1: Numbers of counties and their populations by voting pattern during the study period</b>                                                                                                                                                                    |                       |                       |                       |                       |                       |
|-------------------------------------------------------------------------------------------------------------------------------------------------------------------------------------------------------------------------------------------------------------------------------|-----------------------|-----------------------|-----------------------|-----------------------|-----------------------|
|                                                                                                                                                                                                                                                                               | <b>Election Year</b>  |                       |                       |                       |                       |
| <b>Counties Won (n)</b>                                                                                                                                                                                                                                                       | <b>2000</b>           | <b>2004</b>           | <b>2008</b>           | <b>2012</b>           | <b>2016</b>           |
| Democratic                                                                                                                                                                                                                                                                    | 673<br>(132,833,397)  | 584<br>(130,865,951)  | 874<br>(186,156,072)  | 696<br>(180,198,911)  | 490<br>(176,971,611)  |
| Republican                                                                                                                                                                                                                                                                    | 2439<br>(147,957,141) | 2529<br>(161,279,944) | 2239<br>(117,250,340) | 2417<br>(132,983,590) | 2622<br>(145,413,920) |
| Total                                                                                                                                                                                                                                                                         | 3112                  | 3113                  | 3113                  | 3113                  | 3112                  |
| <b>Large Metro</b>                                                                                                                                                                                                                                                            |                       |                       |                       |                       |                       |
| Democratic                                                                                                                                                                                                                                                                    | 143<br>(91,809,974)   | 128<br>(92,057,876)   | 179<br>(125,389,900)  | 166<br>(127,306,324)  | 156<br>(133,796,619)  |
| Republican                                                                                                                                                                                                                                                                    | 292<br>(61,407,202)   | 308<br>(68,208,618)   | 257<br>(41,135,274)   | 270<br>(45,976,701)   | 280<br>(46,244,883)   |
| <b>Medium Metro</b>                                                                                                                                                                                                                                                           |                       |                       |                       |                       |                       |
| Democratic                                                                                                                                                                                                                                                                    | 176<br>(30,901,916)   | 152<br>(30,462,421)   | 246<br>(48,019,226)   | 204<br>(43,451,908)   | 147<br>(37,730,408)   |
| Republican                                                                                                                                                                                                                                                                    | 551<br>(52,116,112)   | 575<br>(56,347,313)   | 481<br>(42,991,836)   | 523<br>(50,436,610)   | 579<br>(58,741,769)   |
| <b>Rural</b>                                                                                                                                                                                                                                                                  |                       |                       |                       |                       |                       |
| Democratic                                                                                                                                                                                                                                                                    | 354<br>(10,121,507)   | 304<br>(8,345,654)    | 449<br>(12,746,946)   | 326<br>(9,440,679)    | 187<br>(5,444,584)    |
| Republican                                                                                                                                                                                                                                                                    | 1596<br>(34,433,827)  | 1646<br>(36,724,013)  | 1501<br>(33,123,230)  | 1624<br>(36,570,279)  | 1763<br>(40,427,268)  |
| <b>Note: Bedford “city”</b> which was an independent city in Virginia later joined Bedford “county” in July 2013. Onwards from 2014 it was officially counted within county. <b>Broomfield, Colorado</b> was added as a county in Colorado on Nov, 2001 (post 2000 elections) |                       |                       |                       |                       |                       |

| <b>Online Table 2: Population Characteristics of Democratic and Republican Counties in 2001 and 2019</b> |                  |                  |                  |                  |
|----------------------------------------------------------------------------------------------------------|------------------|------------------|------------------|------------------|
|                                                                                                          | <b>2001</b>      |                  | <b>2019</b>      |                  |
|                                                                                                          | Democratic       | Republican       | Democratic       | Republican       |
| Age less than 45                                                                                         | 86,980,183       | 97,758,185       | 107,053,336      | 83,342,984       |
| Age 45 or more                                                                                           | 46,937,362       | 52,659,373       | 71,905,070       | 65,206,502       |
|                                                                                                          |                  |                  |                  |                  |
| Female                                                                                                   | 68,762,074       | 76,009,742       | 91,293,960       | 74,938,067       |
| Male                                                                                                     | 65,155,471       | 74,407,816       | 87,664,446       | 73,611,419       |
|                                                                                                          |                  |                  |                  |                  |
| Black                                                                                                    | 22,005,190       | 13,607,951       | 29,698,855       | 13,504,924       |
| White                                                                                                    | 82,449,996       | 114,950,793      | 88,169,670       | 112,271,563      |
| Hispanic                                                                                                 | 20,419,105       | 16,696,996       | 43,166,828       | 17,352,196       |
| <b>Total</b>                                                                                             | <b>133917545</b> | <b>150417558</b> | <b>178958406</b> | <b>148549486</b> |

| <b>Online Table 3: Joinpoint Analysis Assessing Inflection Point of AAMR per 100K Population Trends for Democratic and Republican Counties from 2001 to 2019</b> |                |                    |                |                    |                    |
|------------------------------------------------------------------------------------------------------------------------------------------------------------------|----------------|--------------------|----------------|--------------------|--------------------|
|                                                                                                                                                                  | <b>Trend 1</b> |                    | <b>Trend 2</b> |                    |                    |
|                                                                                                                                                                  | <b>Years</b>   | <b>APC (CI)</b>    | <b>Years</b>   | <b>APC (CI)</b>    | <b>AAPC (CI)</b>   |
| <b>Overall</b>                                                                                                                                                   | 2001-10        | -1.7* (-1.9, -1.5) | 2010-19        | -0.3* (-0.5, -0.1) | -1.0* (-1.2, -0.9) |
| Democratic                                                                                                                                                       | 2001-09        | -2.1* (-2.3, -1.9) | 2009-19        | -0.8* (-1, -0.6)   | -1.4* (-1.5, -1.2) |
| Republican                                                                                                                                                       | 2001-08        | -1.4* (-1.8, -1)   | 2008-19        | -0.2* (-0.4, 0)    | -0.7* (-0.9, -0.5) |
| Dem Male                                                                                                                                                         | 2001-10        | -2.2* (-2.4, -2)   | 2010-19        | -0.7* (-0.9, -0.5) | -1.4* (-1.6, -1.3) |
| Dem Female                                                                                                                                                       | 2001-09        | -2.0* (-2.3, -1.7) | 2009-19        | -0.9* (-1.1, -0.7) | -1.4* (-1.5, -1.2) |
| Rep Male                                                                                                                                                         | 2001-07        | -1.7* (-2.2, -1.3) | 2007-14        | -0.6* (-1.1, -0.2) | -0.8* (-1, -0.5)   |
| Rep Female                                                                                                                                                       | 2001-07        | -1.4* (-1.9, -1)   | 2007-19        | -0.3* (-0.4, -0.1) | -0.7* (-0.8, -0.5) |
| Dem Black                                                                                                                                                        | 2001-12        | -2.3* (-2.5, -2.1) | 2012-19        | -0.2 (-0.5, 0.1)   | -1.5* (-1.6, -1.3) |
| Dem White                                                                                                                                                        | 2001-09        | -1.8* (-2.1, -1.5) | 2009-19        | -0.5* (-0.7, -0.3) | -1.1* (-1.2, -0.9) |
| Dem Hispanic                                                                                                                                                     | 2001-12        | -1.8* (-2, -1.5)   | 2012-19        | -0.4 (-0.8, 0)     | -1.2* (-1.4, -1)   |
| Rep Black                                                                                                                                                        | 2001-13        | -2.1* (-2.3, -1.9) | 2013-19        | 0.3 (-0.2, 0.9)    | -1.3* (-1.5, -1.1) |
| Rep White                                                                                                                                                        | 2001-07        | -1.3* (-1.8, -0.9) | 2007-19        | -0.1 (-0.3, 0)     | -0.5* (-0.7, -0.4) |
| Rep Hispanic                                                                                                                                                     | 2001-13        | -2.4* (-2.6, -2.2) | 2013-19        | 0.3 (-0.3, 0.9)    | -1.5* (-1.7, -1.3) |
| Dem Large Metro                                                                                                                                                  | 2001-10        | -2.1* (-2.3, -2)   | 2010-19        | -0.7* (-0.9, -0.5) | -1.4* (-1.6, -1.3) |
| Dem Medium Metro                                                                                                                                                 | 2001-09        | -1.7* (-2, -1.5)   | 2009-19        | -0.4* (-0.6, -0.2) | -1.0* (-1.1, -0.8) |
| Dem Rural                                                                                                                                                        | 2001-10        | -2.1* (-2.5, -1.7) | 2010-19        | 0.1 (-0.4, 0.5)    | -1.0* (-1.3, -0.8) |
| Rep Large Metro                                                                                                                                                  | 2001-11        | -1.7* (-1.9, -1.4) | 2011-19        | 0 (-0.3, 0.4)      | -0.9* (-1.1, -0.7) |
| Rep Medium Metro                                                                                                                                                 | 2001-09        | -1.3* (-1.6, -1)   | 2009-19        | -0.2 (-0.4, 0.1)   | -0.7* (-0.9, -0.5) |
| Rep Rural                                                                                                                                                        | 2001-07        | -0.9* (-1.4, -0.5) | 2007-19        | -0.2 (-0.3, 0)     | -0.4* (-0.6, -0.2) |

\*APC/AAPC is significantly different from zero, with p<0.05; + Rep Male Trend 3: 2014-2019, 0.2 (-0.4,0.8)

**Online Table 4: Age Adjusted Mortality Rates per 100K Population and Averaged Annual Percentage Change (AAPC) in Counties that were Exclusively Democratic or Republican from 2001 to 2019**

|                   | 2001   | 2002   | 2003   | 2004   | 2005   | 2006   | 2007   | 2008  | 2009  | 2010  | 2011  | 2012  | 2013  | 2014  | 2015  | 2016  | 2017  | 2018  | 2019  | AMMR Difference (95% CI) | AAPC (%) (95% CI) |
|-------------------|--------|--------|--------|--------|--------|--------|--------|-------|-------|-------|-------|-------|-------|-------|-------|-------|-------|-------|-------|--------------------------|-------------------|
| Democratic        | 838.4  | 829.9  | 815    | 786.1  | 782.4  | 761.2  | 743    | 736.9 | 711.1 | 704.4 | 698.6 | 688.1 | 684.9 | 675.4 | 683.3 | 680.6 | 678.8 | 671.3 | 663.8 | 174.6 (173.2, 176)       | -1.3 (-1.4,-1.2)  |
| Republican        | 882.5  | 887.4  | 878.7  | 846.6  | 853.7  | 826.7  | 812    | 816.7 | 791.9 | 794   | 787.3 | 781.2 | 781.2 | 776.6 | 785.2 | 778.8 | 785.3 | 776.8 | 767.3 | 115.2 (114.7, 115.7)     | -0.8 (-0.9,-0.6)  |
| <b>Democratic</b> |        |        |        |        |        |        |        |       |       |       |       |       |       |       |       |       |       |       |       |                          |                   |
| Male              | 1012.2 | 1002.7 | 981.3  | 946.4  | 938.7  | 914.4  | 892.9  | 881.9 | 853.3 | 844.7 | 834.1 | 822.2 | 816.6 | 807   | 814.6 | 815.6 | 812.4 | 804.3 | 796.9 | 215.3 (213.5, 217.1)     | -1.3 (-1.4,-1.2)  |
| Female            | 709.3  | 701.6  | 690    | 665.7  | 663.3  | 644.1  | 628.1  | 624.7 | 601.6 | 595.9 | 592.5 | 582.5 | 580.7 | 570.8 | 577.7 | 571.2 | 569.7 | 562.2 | 553.9 | 155.4 (149.5, 161.3)     | -1.4 (-1.5,-1.2)  |
| <b>Republican</b> |        |        |        |        |        |        |        |       |       |       |       |       |       |       |       |       |       |       |       |                          |                   |
| Male              | 1063.3 | 1065   | 1048   | 1007.2 | 1013   | 977.6  | 958.7  | 960.8 | 933.9 | 935.6 | 920.3 | 912.1 | 911.5 | 906.2 | 914.2 | 908.7 | 916.9 | 906.5 | 897.1 | 166.2 (165.4, 167)       | -1.0 (-1.1,-0.8)  |
| Female            | 743    | 749.5  | 744.6  | 718.5  | 725.5  | 703.6  | 691.3  | 697.5 | 674.7 | 676.7 | 675.1 | 670.1 | 669.4 | 664.8 | 672.7 | 665.2 | 669.7 | 662.3 | 652.2 | 90.8 (90.2, 91.4)        | -0.7 (-0.9,-0.6)  |
| <b>Democratic</b> |        |        |        |        |        |        |        |       |       |       |       |       |       |       |       |       |       |       |       |                          |                   |
| Black             | 1112.8 | 1103.6 | 1086.6 | 1052.2 | 1038.4 | 1013.4 | 987.6  | 963.3 | 923.3 | 902.6 | 888.6 | 875.2 | 871   | 857.2 | 861.9 | 872.2 | 866.7 | 868.1 | 860.6 | 252.2 (248.9, 255.5)     | -1.4 (-1.7,-1.1)  |
| White             | 817.4  | 811.1  | 796.2  | 771.7  | 768.5  | 749.4  | 733.7  | 731.3 | 708.6 | 704.9 | 704.9 | 692.9 | 692.4 | 687.3 | 696.5 | 692.4 | 694.9 | 685.2 | 676.4 | 141 (139.5, 142.5)       | -1.0 (-1.1,-0.9)  |
| Hispanic          | 650    | 636.1  | 637.3  | 603.3  | 619.9  | 600    | 579.2  | 578.1 | 556.9 | 551.8 | 538.1 | 536.6 | 529.5 | 516.7 | 519.4 | 523.7 | 516.5 | 514.3 | 516.9 | 133.1 (131.8, 134.4)     | -1.3 (-1.5,-1.1)  |
| <b>Republican</b> |        |        |        |        |        |        |        |       |       |       |       |       |       |       |       |       |       |       |       |                          |                   |
| Black             | 1140.9 | 1138.8 | 1131   | 1088.7 | 1084   | 1038.4 | 1018.4 | 993   | 971.4 | 965.5 | 930   | 918   | 919.8 | 899   | 906.8 | 909.6 | 910   | 912.8 | 900   | 240.9 (237.5, 244.3)     | -1.4 (-1.6,-1.2)  |
| White             | 871.4  | 877.1  | 869.5  | 838.6  | 846.8  | 821.6  | 808.6  | 816.2 | 791.4 | 795.5 | 792.7 | 787   | 788.4 | 785.3 | 795.1 | 789.8 | 797.1 | 788.4 | 778.8 | 92.6 (92.2, 93)          | -0.6 (-0.8,-0.5)  |
| Hispanic          | 689.8  | 695.3  | 666.2  | 640.8  | 644.9  | 604.9  | 596.3  | 586.4 | 566.1 | 566.1 | 541.1 | 541.7 | 534.8 | 528.6 | 529.5 | 519.2 | 532.8 | 529.8 | 527.2 | 162.6 (160.6, 164.6)     | -1.6 (-1.8,-1.4)  |
| <b>Democratic</b> |        |        |        |        |        |        |        |       |       |       |       |       |       |       |       |       |       |       |       |                          |                   |
| Large Metro       | 837.2  | 826.2  | 810.5  | 782    | 776.9  | 755.6  | 736    | 729.8 | 701.8 | 694.5 | 687.8 | 675.3 | 671   | 660.5 | 667.8 | 666.5 | 662.6 | 654.7 | 646.3 | 190.9 (188.2, 193.6)     | -1.4 (-1.5,-1.3)  |
| Small-Med Metro   | 825.5  | 825.9  | 814.5  | 783.4  | 784.1  | 762.3  | 746.5  | 741.9 | 723.4 | 718.3 | 715.7 | 710.8 | 710.9 | 704.7 | 713.4 | 707   | 712.1 | 706.3 | 701.6 | 123.9 (122.6, 125.2)     | -0.9 (-1.1,-0.8)  |
| Rural             | 933    | 925.6  | 908.2  | 883.2  | 883.9  | 866.4  | 860.9  | 849   | 825.7 | 823   | 818.7 | 814   | 815.4 | 812.7 | 827   | 818.8 | 821.5 | 813.3 | 808.7 | 124.3 (120.7, 127.9)     | -0.8 (-0.9,-0.6)  |
| <b>Republican</b> |        |        |        |        |        |        |        |       |       |       |       |       |       |       |       |       |       |       |       |                          |                   |
| Large Metro       | 863.5  | 865.6  | 846.8  | 816.1  | 819.7  | 786    | 768    | 768.7 | 743.3 | 748.6 | 738.5 | 729.5 | 724.6 | 718.5 | 724.3 | 719.5 | 728.4 | 717.8 | 708.3 | 155.2 (154.2, 156.2)     | -1.1 (-1.3,-1.0)  |
| Small-Med Metro   | 874.2  | 875.2  | 872.8  | 839.8  | 847.4  | 823.1  | 806.7  | 807.2 | 784.4 | 787.1 | 778.3 | 774.6 | 775.6 | 772.2 | 779.1 | 773.4 | 779.9 | 772.4 | 760.5 | 113.7 (113, 114.4)       | -0.8 (-0.9,-0.6)  |
| Rural             | 910.4  | 922.6  | 914.4  | 883.1  | 893    | 868.3  | 858.6  | 872.7 | 847.2 | 846.8 | 846.9 | 841.3 | 845   | 841.5 | 856.5 | 849   | 854.3 | 848.4 | 843.4 | 67 (66.4, 67.6)          | -0.4 (-0.6,-0.3)  |

| <b>Online Table 5: Joinpoint Analysis Assessing Inflection Point of AAMR per 100K Population Trends for Exclusively Democratic and Republican Counties from 2001 to 2019</b> |                |                    |                |                    |                    |
|------------------------------------------------------------------------------------------------------------------------------------------------------------------------------|----------------|--------------------|----------------|--------------------|--------------------|
|                                                                                                                                                                              | <b>Trend 1</b> |                    | <b>Trend 2</b> |                    |                    |
|                                                                                                                                                                              | <b>Years</b>   | <b>APC (CI)</b>    | <b>Years</b>   | <b>APC (CI)</b>    | <b>AAPC (CI)</b>   |
| Democratic                                                                                                                                                                   | 2001-10        | -2.1* (-2.2, -1.9) | 2010-19        | -0.6* (-0.7, -0.4) | -1.3* (-1.4, -1.2) |
| Republican                                                                                                                                                                   | 2001-10        | -1.4* (-1.6, -1.1) | 2010-19        | -0.2 (-0.4, 0.1)   | -0.8* (-0.9, -0.6) |
| Dem Male                                                                                                                                                                     | 2001-11        | -2.1* (-2.2, -1.9) | 2011-19        | -0.4* (-0.6, -0.2) | -1.3* (-1.4, -1.2) |
| Dem Female                                                                                                                                                                   | 2001-10        | -2.0* (-2.2, -1.8) | 2010-19        | -0.7* (-0.9, -0.5) | -1.4* (-1.5, -1.2) |
| Rep Male                                                                                                                                                                     | 2001-10        | -1.7* (-1.9, -1.4) | 2010-19        | -0.2* (-0.5, 0)    | -1.0* (-1.1, -0.8) |
| Rep Female                                                                                                                                                                   | 2001-09        | -1.3* (-1.6, -1)   | 2009-19        | -0.3* (-0.5, -0.1) | -0.7* (-0.9, -0.6) |
| Dem Black                                                                                                                                                                    | 2001-03        | -1.2 (-3.5, 1.1)   | 2003-12        | -2.5* (-2.7, -2.2) | -1.4* (-1.7, -1.1) |
| Dem White                                                                                                                                                                    | 2001-10        | -1.7* (-1.9, -1.5) | 2010-19        | -0.3* (-0.5, -0.1) | -1.0* (-1.1, -0.9) |
| Dem Hispanic                                                                                                                                                                 | 2001-13        | -1.8* (-2, -1.6)   | 2013-19        | -0.3 (-0.9, 0.3)   | -1.3* (-1.5, -1.1) |
| Rep Black                                                                                                                                                                    | 2001-12        | -2.2* (-2.4, -1.9) | 2012-19        | -0.2 (-0.6, 0.2)   | -1.4* (-1.6, -1.2) |
| Rep White                                                                                                                                                                    | 2001-09        | -1.3* (-1.6, -1)   | 2009-19        | -0.1 (-0.3, 0.1)   | -0.6* (-0.8, -0.5) |
| Rep Hispanic                                                                                                                                                                 | 2001-11        | -2.5* (-2.9, -2.2) | 2011-19        | -0.4 (-0.8, 0)     | -1.6* (-1.8, -1.4) |
| Dem Large Metro                                                                                                                                                              | 2001-11        | -2.1* (-2.3, -1.9) | 2011-19        | -0.6* (-0.8, -0.3) | -1.4* (-1.5, -1.3) |
| Dem Medium Metro                                                                                                                                                             | 2001-10        | -1.7* (-1.9, -1.5) | 2010-19        | -0.2 (-0.4, 0)     | -0.9* (-1.1, -0.8) |
| Dem Rural                                                                                                                                                                    | 2001-10        | -1.4* (-1.6, -1.2) | 2010-19        | -0.1 (-0.3, 0.1)   | -0.8* (-0.9, -0.6) |
| Rep Large Metro                                                                                                                                                              | 2001-09        | -2.0* (-2.3, -1.7) | 2009-19        | -0.5* (-0.7, -0.2) | -1.1* (-1.3, -1)   |
| Rep Medium Metro                                                                                                                                                             | 2001-2010      | -1.4* (-1.6, -1.1) | 2010-2019      | -0.2 (-0.4, 0.1)   | -0.8* (-0.9, -0.6) |
| Rep Rural                                                                                                                                                                    | 2001-10        | -1.0* (-1.2, -0.7) | 2010-19        | 0.1 (-0.2, 0.4)    | -0.4* (-0.6, -0.3) |

\*APC/AAPC is significantly different from zero, with p<0.05; + Dem Black Trend 3: 2012-2019, 0 (-0.3,0.3)

**Online Table 6: Age Adjusted Mortality Rates per 100K Population for Counties voting for Democratic or Republican Governors by State Group from 2001 to 2019**

|                          | 2001   | 2002   | 2003   | 2004   | 2005  | 2006  | 2007  | 2008  | 2009  | 2010  | 2011  | 2012  | 2013  | 2014  | 2015  | 2016  | 2017  | 2018  | 2019  |
|--------------------------|--------|--------|--------|--------|-------|-------|-------|-------|-------|-------|-------|-------|-------|-------|-------|-------|-------|-------|-------|
| <b>Democratic States</b> |        |        |        |        |       |       |       |       |       |       |       |       |       |       |       |       |       |       |       |
| Group A                  | 806    | 786.4  | 748.1  | 736    | 775.6 | 720.8 | 732.4 | 715.9 | 691.6 | 690.4 | 704.6 | 684   | 648.7 | 700.1 | 709.4 | 713.5 | 708.8 | 707.7 | 716   |
| Group B                  | 848.7  | 842.1  | 836.9  | 807.2  | 807.7 | 786.5 | 765.6 | 764.6 | 737.9 | 733.9 | 702.8 | 695.4 | 690.5 | 681.5 | 669.1 | 665.5 | 662.4 | 654.2 | 668.7 |
| Group C                  | 891.2  | 883.5  | 876.5  | 845.7  | 859.3 | 838.3 | 824.2 | 825.8 | 789   | 783.2 | 778.4 | 766   | 777.4 | 776.3 | 783.7 | 778.5 | 762.6 | 746.2 | 742   |
| Group D                  | 1005   | 1021.7 | 995.8  | 1008.9 | 1033  | 999.8 | 974   | 935.1 | 917.4 | 921.9 | 917.7 | 913.7 | 904.9 | 910.8 | 923.3 | 904.6 | 902   | 887.7 | 884.5 |
| Group E                  | 894.1  | 851.5  | 841.6  | 805.5  | 799.1 | 762.2 | 749.5 | 737.9 | 707.9 | 724   | 717   | 699.9 | 707.5 | 670.1 | 677.7 | 671.9 | 670.1 | 663.3 | 654.2 |
| <b>Republican States</b> |        |        |        |        |       |       |       |       |       |       |       |       |       |       |       |       |       |       |       |
| Group A                  | 852.4  | 830.1  | 777.6  | 777.4  | 756   | 736.5 | 734.6 | 721.4 | 683.2 | 718.7 | 727.8 | 715.3 | 763.3 | 741.5 | 728.1 | 724.3 | 721.5 | 712.9 | 689   |
| Group B                  | 846.7  | 846.5  | 828.2  | 800.8  | 800.5 | 777.8 | 762.5 | 761.2 | 738.9 | 737.5 | 751.3 | 740.9 | 743.9 | 737.1 | 756.8 | 751.9 | 758.9 | 750.8 | 735   |
| Group C                  | 866.3  | 869.7  | 864.7  | 825.5  | 832.7 | 808.4 | 791.7 | 805.2 | 788.1 | 790.7 | 787.2 | 789   | 773.1 | 765.9 | 780.8 | 772   | 798   | 787.6 | 778.5 |
| Group D                  | 1020.9 | 1018.1 | 1021.4 | 943.2  | 975.1 | 930.8 | 913.1 | 956.2 | 922.5 | 923.2 | 910.2 | 917.9 | 919.5 | 909.1 | 910.9 | 922.4 | 926.3 | 916.4 | 908.8 |
| Group E                  | 825.7  | 814.7  | 809.6  | 771.6  | 779.3 | 775   | 758.2 | 757.1 | 734.7 | 709.3 | 712.5 | 703   | 694.7 | 698.6 | 698.8 | 699   | 702.1 | 743.7 | 728.3 |

**Group A** includes only New Hampshire and Vermont, which hold their gubernatorial elections every even numbered year (e.g. 2002, 2004, 2006 and so forth). The other 48 states hold gubernatorial elections every four years. **Group B** includes Alabama, Alaska, Arizona, Arkansas, California, Colorado, Connecticut, Florida, Georgia, Hawaii, Idaho, Illinois, Iowa, Kansas, Maine, Maryland, Massachusetts, Michigan, Minnesota, Nebraska, Nevada, New Mexico, New York, Ohio, Oklahoma, Oregon, Pennsylvania, Rhode Island, South Carolina, South Dakota, Tennessee, Texas, Wisconsin, Wyoming and Washington DC. Group B states hold their gubernatorial elections during a midterm election year. Recent years are 2002, 2006, 2010, 2014, and 2018. **Group C** includes Delaware, Indiana, Missouri, Montana, North Carolina, North Dakota, Utah, Washington and West Virginia; Group C states hold their gubernatorial elections during a presidential election year and recent years are 2004, 2008, 2012 and 2016. **Group D** includes Kentucky, Louisiana, and Mississippi; Group D states hold their gubernatorial elections the year before a presidential election year. Recent years are 2007, 2011, 2015, and 2019. **Group E** includes New Jersey and Virginia, which hold their gubernatorial elections the year after a presidential election year. Recent years are 2005, 2009, 2013, and 2017.

**Online Figure 1:** Trends in Age-Adjusted Mortality per 100K Population of Residents of Counties Voting Exclusively for Democratic or Republican Presidential Candidates. Dashed line indicates inflection point for both Exclusively Republican and Democratic counties.

**Online Figure 1**

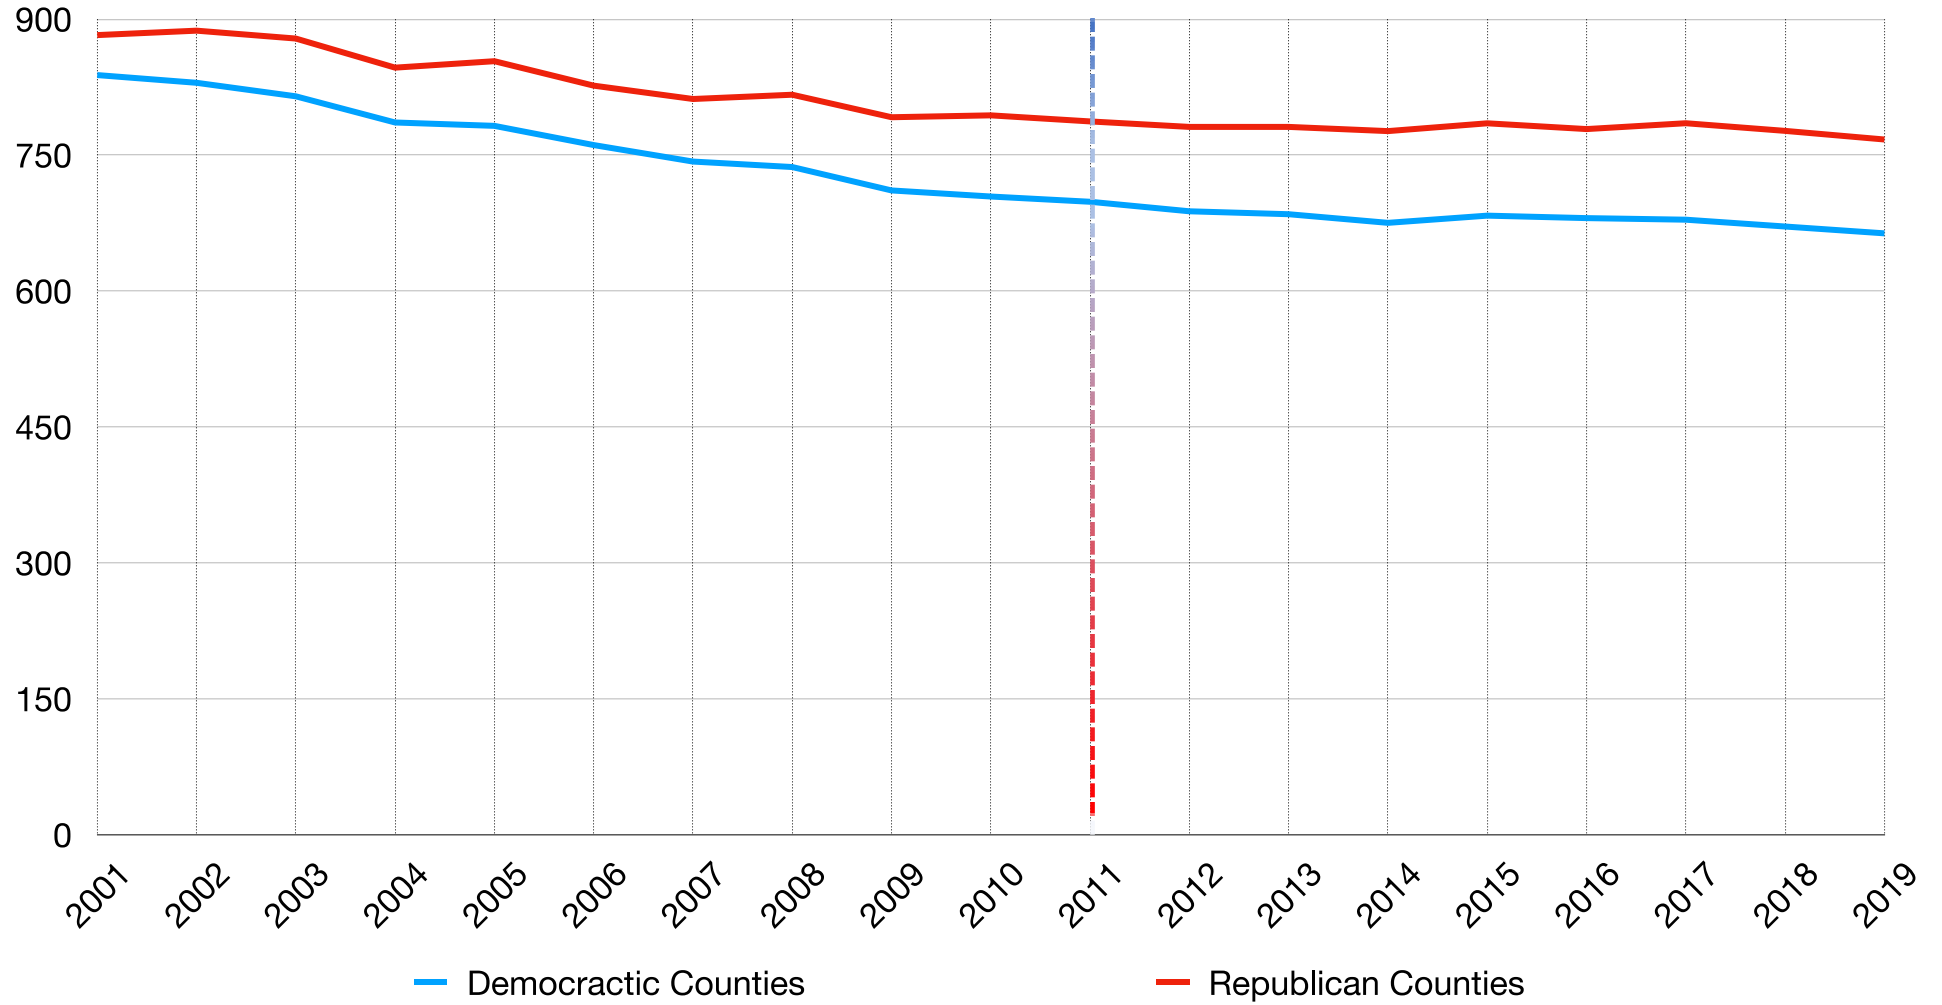

**Online Figure 2:** Trends in Age-Adjusted Mortality Rates per 100K Population of Residents of Counties Exclusively Voting for Democratic or Republican Presidential Candidates by Sex.

**Online Figure 2**

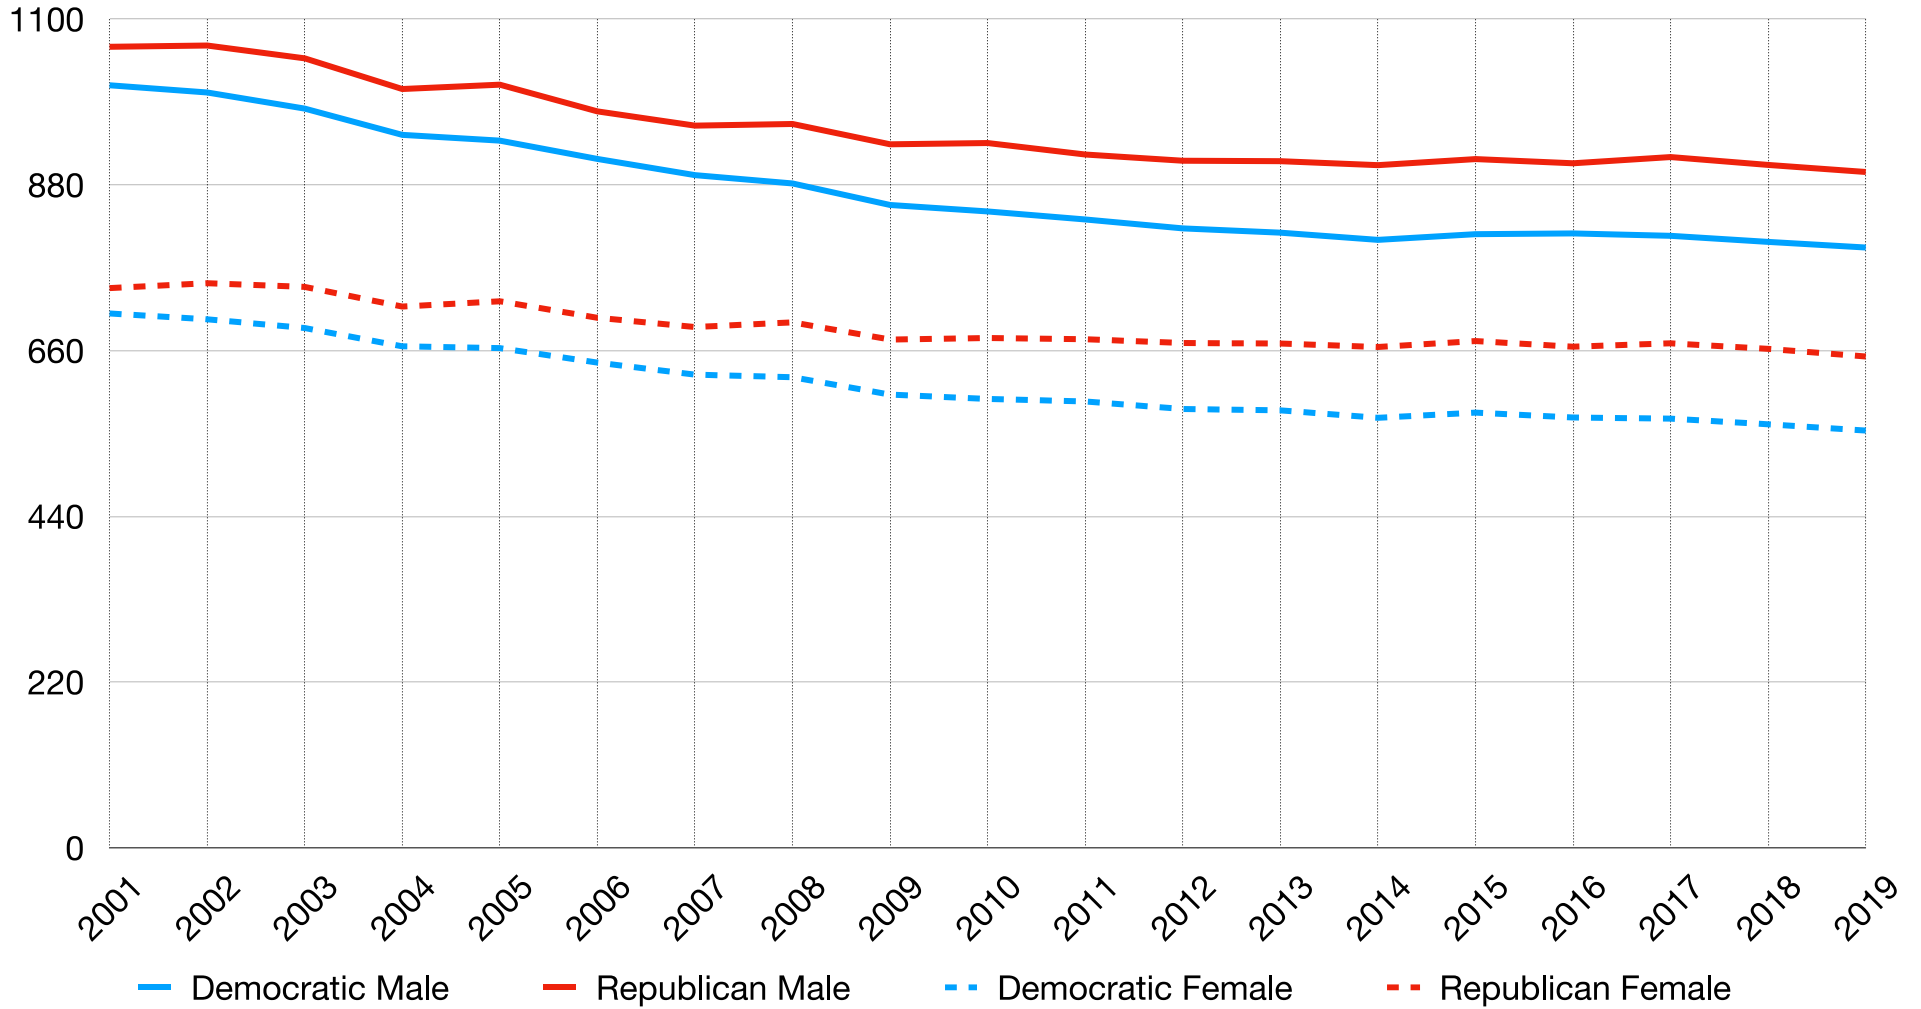



**Online Figure 3:** Trends in Age-Adjusted Mortality Rates per 100K Population of Residents of Counties Exclusively Voting for Democratic or Republican Presidential Candidates by Race/Ethnicity.

**Online Figure 3**

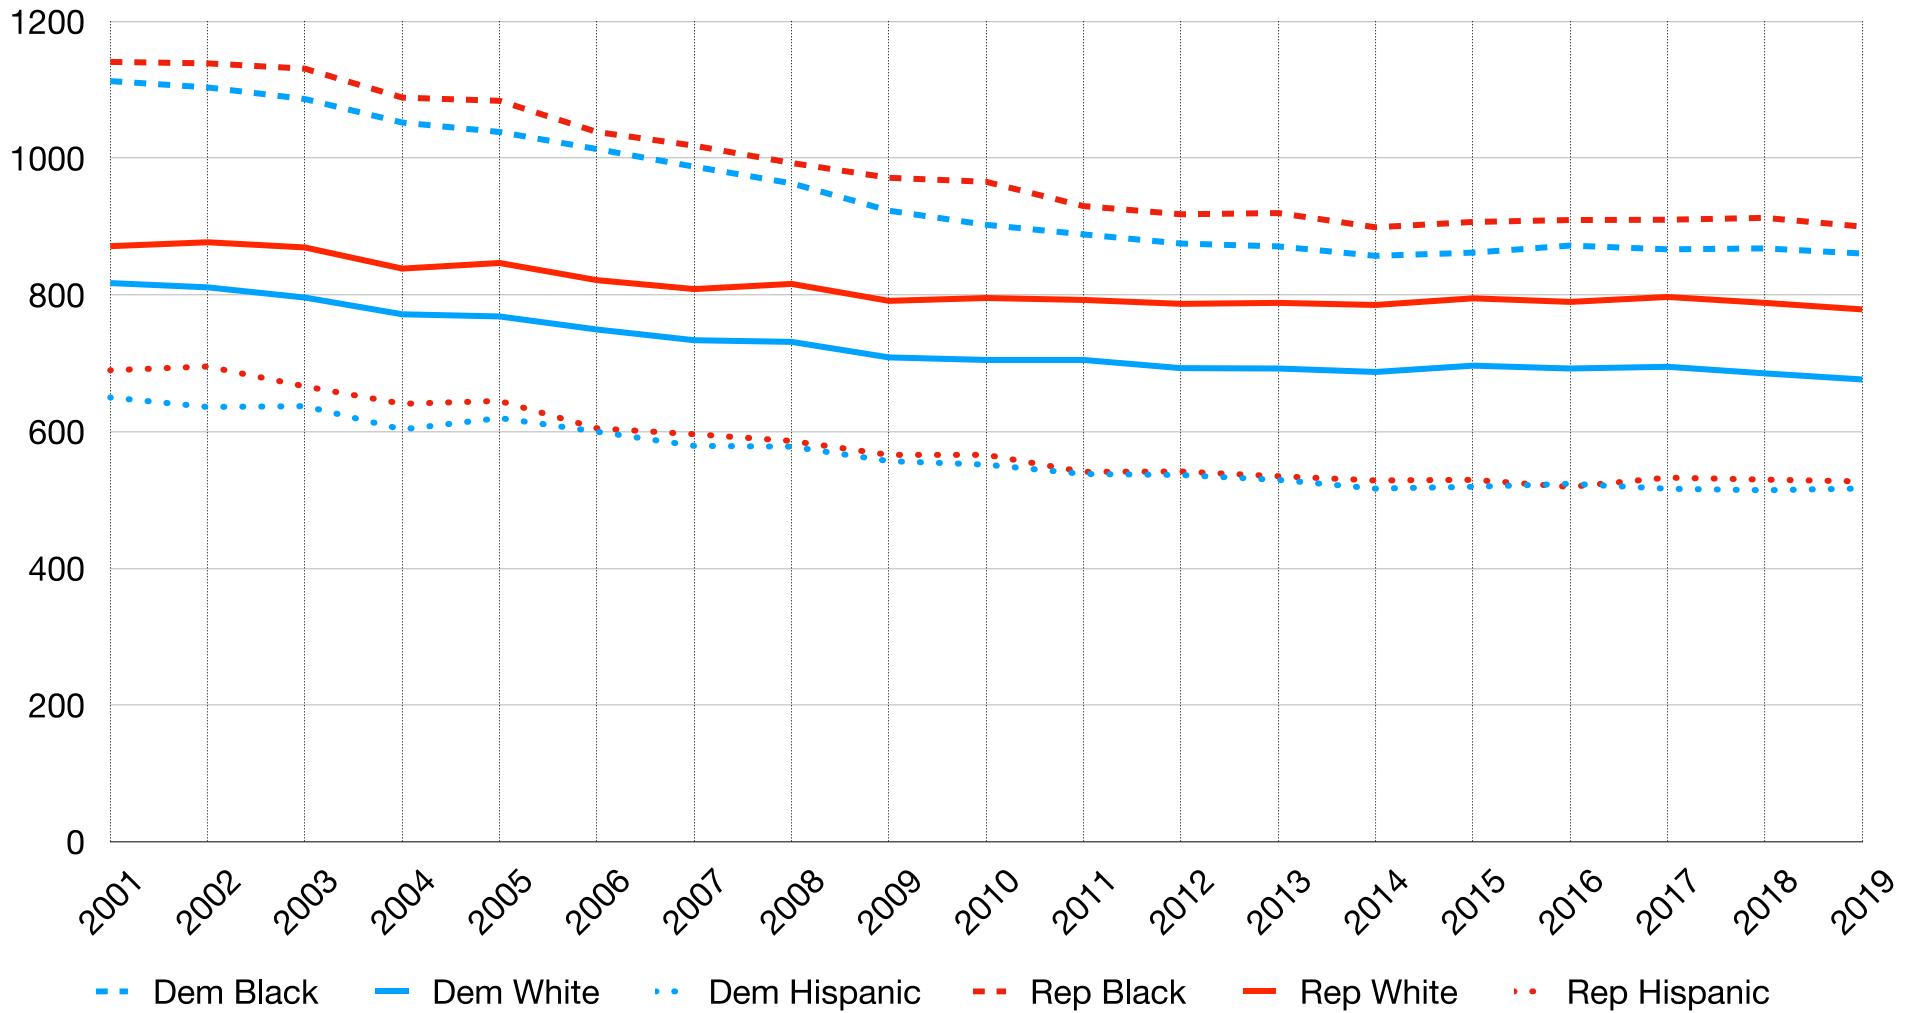

**Online Figure 4:** Trends in Age-Adjusted Mortality Rates per 100K Population of Residents of Counties Voting Exclusively for Democratic or Republican Presidential Candidates by Urban-Rural Location.

**Online Figure 4**

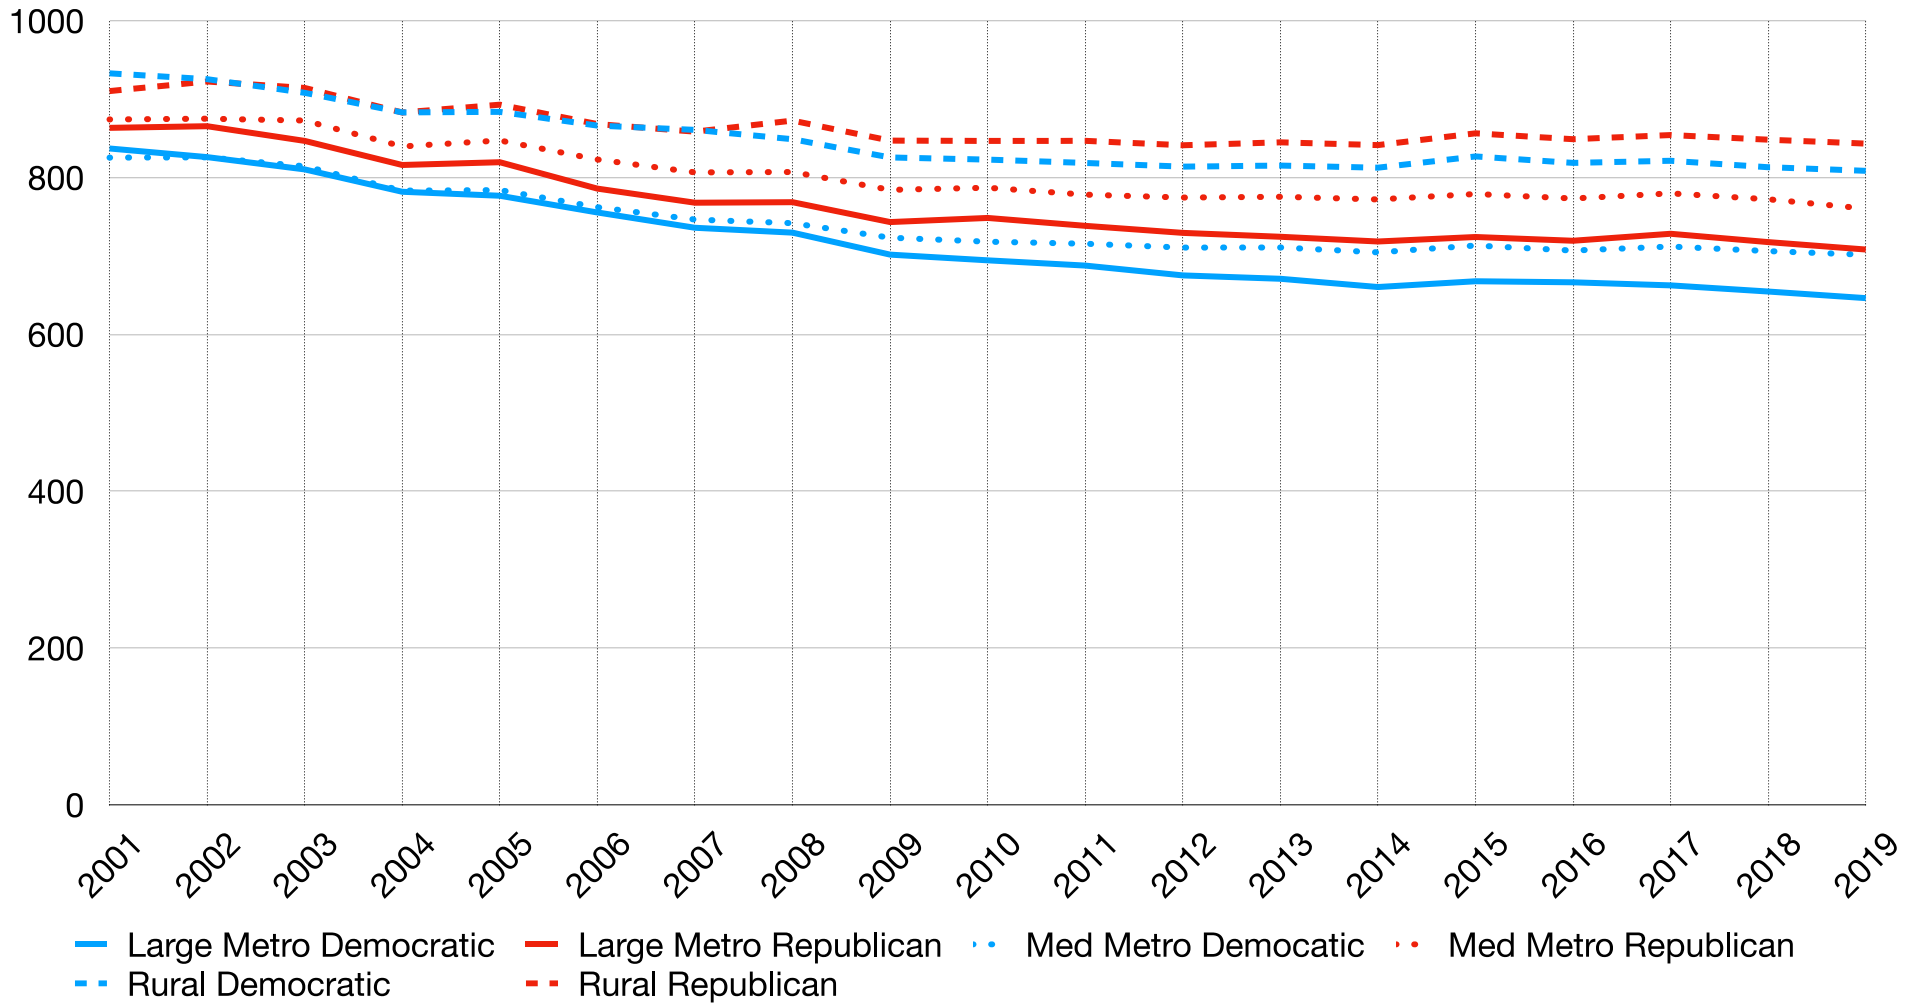

Supplement: warh069308.ww.pdf [file warh069308.ww.pdf]
